# Supplementary material for: A new methodology for sensory quality assessment of garlic based on metabolomics and an artificial neural network
Source: PubMed Central journal article supplement — RSC Adv. 2019 Jun 6;9(31):17754–65. doi: 10.1039/c9ra01978b (PMC9064673; doi:10.1039/c9ra01978b), 2019-06-06
Supplement: RA-009-C9RA01978B-s001.pdf [file RA-009-C9RA01978B-s001.pdf]

**Table S1** The detailed information of garlic samples

| NO. | Code | Origin                                 | Cultivar     |
|-----|------|----------------------------------------|--------------|
| 1   | SD1  | Lv County, Rizhao City, Shandong       | Rizhaohong   |
| 2   | SD2  | Jinxiang County, Jining City, Shandong | Jinxiang     |
| 3   | SD3  | Chengwu County, Heze City, Shandong    | Chengwu      |
| 4   | SD4  | Lanshan County, Linyi City, Shandong   | Ershuizao    |
| 5   | SD5  | Anqiu City, Weifang City, Shandong     | Anqiu        |
| 6   | SD6  | Lanling County, Linyi City, Shandong   | Cangshan     |
| 7   | SD7  | Laicheng County, Laiwu City, Shandong  | Laiwu        |
| 8   | JS1  | Feng County, Xuzhou City, Jiangsu      | Taikongerhao |
| 9   | JS2  | Pei County, Xuzhou City, Jiangsu       | Sanyuehuang  |
| 10  | JS3  | Tongshan County, Xuzhou City, Jiangsu  | Lunong       |
| 11  | JS4  | Jiawang County, Xuzhou City, Jiangsu   | Taikongzao   |
| 12  | JS5  | Xinyi County, Xuzhou City, Jiangsu     | Yandu        |
| 13  | JS6  | Pizhou County, Xuzhou City, Jiangsu    | Pizhou       |
| 14  | JS7  | Quanshan County, Xuzhou City, Jiangsu  | erjizao      |
| 15  | HN1  | Zhongmou County, Zhengzhou City,       | Sumu         |
| 16  | HN2  | Huiji County, Zhengzhou City, Henan    | Caijiapo     |
| 17  | HN3  | Lankao County, Kaifeng City, Henan     | Songcheng    |
| 18  | HN4  | Tongxu County, Kaifeng City, Henan     | Tongxu       |
| 19  | HN5  | Weishi County, Kaifeng City, Henan     | Liubanhong   |
| 20  | HN6  | Qi County, Kaifeng City, Henan         | Qixian       |
| 21  | HN7  | Minquan County, Shangqiu City, Henan   | Minquan      |
| 22  | YN1  | Guandu County, Kunming City, Yunnan    | Siliuban     |
| 23  | YN2  | Mengzi County, Honghe City, Yunnan     | Hongqixing   |
| 24  | YN3  | Chenggong County, Kunming City,        | Chenggong    |
| 25  | YN4  | Luliang County, Qujing City, Yunnan    | Luliang      |
| 26  | YN5  | Midu County, Dali City, Yunnan         | Midu         |
| 27  | YN6  | Eryuan County, Dali City, Yunnan       | Dali         |
| 28  | YN7  | Binchuan County, Dali City, Yunnan     | Binchuan     |

**Table S2** Sensory evaluation standard of fresh garlic

| Texture         | Taste          | Appearance                | Flavour                 | Overall impression |
|-----------------|----------------|---------------------------|-------------------------|--------------------|
| Highly hard     | Rare spicy     | Pure white                | Rare garlic flavour     | 0-1                |
| Relatively hard | Slightly spicy | White and a little yellow | Slightly garlic flavour | 1-3                |
| Hard            | Moderate spicy | White and light yellow    | Moderate garlic flavour | 3-5                |
| Semi-hard       | Very spicy     | White and moderate yellow | Highly garlic flavour   | 5-7                |
| Suitably-hard   | Strong spicy   | Yellowish-white           | Strong garlic flavour   | 7-9                |

**Table S3** Variation of 43 indicators for garlic samples

| NO. | Minimum | Maximum | Average | SD    | CV     |
|-----|---------|---------|---------|-------|--------|
| X1  | 31.42   | 33.38   | 32.72   | 0.60  | 1.83%  |
| X2  | 0.41    | 1.04    | 0.61    | 0.22  | 35.94% |
| X3  | 3.36    | 5.29    | 4.06    | 0.61  | 14.97% |
| X4  | 21.45   | 61.56   | 39.00   | 11.43 | 29.30% |
| X5  | 1.17    | 4.59    | 2.78    | 0.93  | 33.41% |
| X6  | 0.23    | 0.85    | 0.52    | 0.21  | 40.15% |
| X7  | 0.24    | 0.61    | 0.47    | 0.10  | 20.50% |
| X8  | 0.01    | 0.04    | 0.03    | 0.01  | 22.70% |
| X9  | 0.03    | 0.13    | 0.08    | 0.04  | 42.61% |
| X10 | 0.00    | 0.02    | 0.01    | 0.00  | 33.21% |
| X11 | 0.00    | 0.01    | 0.01    | 0.00  | 25.03% |
| X12 | 0.02    | 0.17    | 0.10    | 0.05  | 46.35% |
| X13 | 0.00    | 0.01    | 0.01    | 0.00  | 56.45% |
| X14 | 2.92    | 4.48    | 3.71    | 0.55  | 14.71% |
| X15 | 0.93    | 2.75    | 1.90    | 0.63  | 33.32% |
| X16 | 0.22    | 0.59    | 0.43    | 0.11  | 24.81% |
| X17 | 0.35    | 1.21    | 0.87    | 0.26  | 29.48% |
| X18 | 0.13    | 0.28    | 0.21    | 0.04  | 21.65% |
| X19 | 0.04    | 0.11    | 0.08    | 0.02  | 25.98% |
| X20 | 1.09    | 1.74    | 1.49    | 0.18  | 12.00% |
| X21 | 0.00    | 0.06    | 0.02    | 0.01  | 62.15% |
| X22 | 0.04    | 0.15    | 0.09    | 0.04  | 40.37% |
| X23 | 0.03    | 0.49    | 0.23    | 0.12  | 53.66% |
| X24 | 0.01    | 0.10    | 0.06    | 0.02  | 40.64% |
| X25 | 0.01    | 0.05    | 0.03    | 0.01  | 29.85% |
| X26 | 0.17    | 0.49    | 0.30    | 0.09  | 31.13% |
| X27 | 0.12    | 0.88    | 0.48    | 0.23  | 49.00% |
| X28 | 0.01    | 0.07    | 0.04    | 0.02  | 51.27% |
| X29 | 0.01    | 0.34    | 0.12    | 0.10  | 85.19% |
| X30 | 0.12    | 0.36    | 0.23    | 0.08  | 36.03% |
| X31 | 0.00    | 0.01    | 0.01    | 0.00  | 70.95% |
| X32 | 0.05    | 0.40    | 0.17    | 0.11  | 66.50% |
| X33 | 0.03    | 0.51    | 0.21    | 0.14  | 68.10% |
| X34 | 0.05    | 0.55    | 0.27    | 0.16  | 59.75% |
| X35 | 1.10    | 2.68    | 1.61    | 0.38  | 23.42% |
| X36 | 0.13    | 1.08    | 0.59    | 0.33  | 55.93% |
| X37 | 0.03    | 0.43    | 0.24    | 0.12  | 52.44% |
| X38 | 0.11    | 0.22    | 0.16    | 0.03  | 21.29% |
| X39 | 0.01    | 0.16    | 0.04    | 0.04  | 93.06% |
| X40 | 0.01    | 0.14    | 0.06    | 0.05  | 74.63% |
| X41 | 0.60    | 1.45    | 0.81    | 0.21  | 25.40% |
| X42 | 0.00    | 0.03    | 0.02    | 0.01  | 48.54% |
| X43 | 7.10    | 9.22    | 8.10    | 0.58  | 7.15%  |

SD and CV mean standard deviation and coefficient of variation, respectively. X1-X43: L\* value, a\* value, b\* value, ascorbic acid, S-methyl-L-cysteine, quercitrin, propene, propene sulfide, 2-propen-1-ol, di(1-propenyl) sulfide, 2-ethylthiophene, methyl propenyl disulfide, dimethyl trisulfide, diallyl disulfide, diallyl tetrasulphide, (Z)-benzaloxime, 3-vinyl-1,2-dithiacyclohex-4-ene, diallyl trisulfide, 3-vinyl-1,2-dithiacyclohex-5-ene, propionic acid, 1,3-propanediol, L-alanine, ethanimidic acid, serine, L-threonine, L-proline, n.-octanoic acid, xylulose, ornithine, glutamic acid, arabinose, L-asparagine, lanthionine, L-tyrosine, isocitric acid, D-fructose, D-glucose, L-lysine, gluconic acid, L-homoserine, myo-inositol, succinylacetone, sucrose.

**Table S4** Correlation analysis on 43 indicators

|     | X1     | X2     | X3     | X4     | X5     | X6    | X7     | X8     | X9     | X10    | X11    | X12    | X13    | X14    | X15    |
|-----|--------|--------|--------|--------|--------|-------|--------|--------|--------|--------|--------|--------|--------|--------|--------|
| X1  | 1.00   |        |        |        |        |       |        |        |        |        |        |        |        |        |        |
| X2  | -0.86* | 1.00   |        |        |        |       |        |        |        |        |        |        |        |        |        |
| X3  | -0.83* | 0.96*  | 1.00   |        |        |       |        |        |        |        |        |        |        |        |        |
| X4  | -0.64  | 0.78*  | 0.68   | 1.00   |        |       |        |        |        |        |        |        |        |        |        |
| X5  | 0.75*  | -0.87* | -0.87* | -0.67  | 1.00   |       |        |        |        |        |        |        |        |        |        |
| X6  | -0.55  | 0.58   | 0.57   | 0.28   | -0.59  | 1.00  |        |        |        |        |        |        |        |        |        |
| X7  | -0.19  | 0.17   | 0.10   | 0.34   | -0.07  | 0.22  | 1.00   |        |        |        |        |        |        |        |        |
| X8  | -0.63  | 0.71*  | 0.67   | 0.65   | -0.59  | 0.50  | 0.72*  | 1.00   |        |        |        |        |        |        |        |
| X9  | -0.52  | 0.43   | 0.39   | 0.52   | -0.30  | 0.08  | 0.56   | 0.70*  | 1.00   |        |        |        |        |        |        |
| X10 | 0.53   | -0.72* | -0.74* | -0.63  | 0.67   | -0.20 | 0.24   | -0.26  | -0.13  | 1.00   |        |        |        |        |        |
| X11 | -0.42  | 0.46   | 0.39   | 0.51   | -0.35  | 0.47  | 0.86*  | 0.85*  | 0.61   | -0.04  | 1.00   |        |        |        |        |
| X12 | 0.55   | -0.61  | -0.65  | -0.32  | 0.69   | -0.41 | 0.42   | -0.16  | -0.04  | 0.62   | 0.13   | 1.00   |        |        |        |
| X13 | 0.47   | -0.58  | -0.60  | -0.17  | 0.57   | -0.37 | 0.56   | 0.04   | 0.27   | 0.53   | 0.29   | 0.73*  | 1.00   |        |        |
| X14 | 0.44   | -0.55  | -0.61  | -0.21  | 0.61   | -0.32 | 0.64   | 0.07   | 0.28   | 0.70*  | 0.38   | 0.80*  | 0.91*  | 1.00   |        |
| X15 | 0.55   | -0.73* | -0.77* | -0.42  | 0.71*  | -0.36 | 0.45   | -0.16  | 0.12   | 0.83*  | 0.15   | 0.80*  | 0.86*  | 0.93*  | 1.00   |
| X16 | -0.17  | 0.17   | 0.11   | 0.36   | -0.07  | 0.13  | 0.92*  | 0.69   | 0.58   | 0.20   | 0.82*  | 0.30   | 0.56   | 0.64   | 0.42   |
| X17 | -0.52  | 0.51   | 0.45   | 0.50   | -0.42  | 0.52  | 0.81*  | 0.88*  | 0.73*  | 0.00   | 0.92*  | 0.03   | 0.21   | 0.33   | 0.14   |
| X18 | 0.04   | -0.18  | -0.24  | 0.10   | 0.26   | -0.03 | 0.81*  | 0.40   | 0.58   | 0.53   | 0.62   | 0.57   | 0.76*  | 0.86*  | 0.76*  |
| X19 | -0.40  | 0.45   | 0.38   | 0.57   | -0.29  | 0.36  | 0.76*  | 0.85*  | 0.64   | -0.06  | 0.85*  | 0.08   | 0.31   | 0.35   | 0.12   |
| X20 | -0.56  | 0.69   | 0.64   | 0.72*  | -0.44  | 0.28  | 0.62   | 0.80*  | 0.74*  | -0.37  | 0.75*  | -0.02  | 0.05   | 0.13   | -0.14  |
| X21 | -0.64  | 0.74*  | 0.72*  | 0.41   | -0.69  | 0.72* | 0.07   | 0.48   | 0.12   | -0.41  | 0.32   | -0.41  | -0.57  | -0.48  | -0.56  |
| X22 | 0.23   | -0.24  | -0.20  | -0.50  | 0.06   | -0.08 | -0.81* | -0.68  | -0.71* | 0.00   | -0.81  | -0.40  | -0.52  | -0.57  | -0.33  |
| X23 | 0.30   | -0.51  | -0.52  | -0.27  | 0.60   | -0.59 | 0.15   | -0.20  | 0.37   | 0.42   | -0.07  | 0.65   | 0.62   | 0.64   | 0.64   |
| X24 | -0.03  | -0.11  | -0.08  | -0.35  | -0.08  | 0.33  | -0.44  | -0.30  | -0.41  | 0.19   | -0.42  | -0.32  | -0.38  | -0.34  | -0.12  |
| X25 | 0.11   | -0.22  | -0.14  | -0.40  | 0.03   | 0.25  | -0.46  | -0.33  | -0.38  | 0.22   | -0.53  | -0.29  | -0.24  | -0.30  | -0.05  |
| X26 | -0.13  | -0.01  | -0.02  | -0.30  | 0.00   | 0.61  | 0.35   | 0.26   | 0.07   | 0.47   | 0.37   | 0.04   | 0.06   | 0.22   | 0.29   |
| X27 | -0.38  | 0.62   | 0.63   | 0.56   | -0.46  | -0.09 | -0.25  | 0.21   | 0.15   | -0.87* | -0.07  | -0.46  | -0.48  | -0.59  | -0.74  |
| X28 | -0.25  | 0.10   | 0.05   | 0.08   | -0.05  | 0.53  | 0.75*  | 0.53   | 0.41   | 0.42   | 0.75*  | 0.32   | 0.40   | 0.55   | 0.47   |
| X29 | -0.66  | 0.84*  | 0.88*  | 0.49   | -0.79* | 0.50  | -0.20  | 0.41   | 0.09   | -0.75* | 0.08   | -0.70* | -0.76* | -0.81* | -0.90* |
| X30 | 0.48   | -0.59  | -0.52  | -0.80* | 0.40   | -0.07 | -0.63  | -0.70* | -0.68  | 0.40   | -0.69  | -0.06  | -0.12  | -0.16  | 0.11   |
| X31 | 0.70*  | -0.78* | -0.81* | -0.37  | 0.79*  | -0.65 | 0.26   | -0.30  | 0.07   | 0.63   | -0.02  | 0.81*  | 0.86*  | 0.86*  | 0.89*  |
| X32 | 0.17   | -0.10  | -0.05  | -0.30  | 0.03   | -0.28 | -0.83* | -0.57  | -0.57  | -0.25  | -0.81* | -0.48  | -0.57  | -0.66  | -0.51  |
| X33 | -0.51  | 0.74*  | 0.75*  | 0.65   | -0.64  | 0.17  | -0.21  | 0.32   | 0.14   | -0.89* | 0.02   | -0.50  | -0.59  | -0.71* | -0.84* |
| X34 | -0.36  | 0.53   | 0.56   | 0.45   | -0.49  | -0.14 | -0.40  | 0.10   | 0.16   | -0.76* | -0.24  | -0.70* | -0.54  | -0.66  | -0.74* |
| X35 | -0.02  | -0.02  | -0.05  | 0.30   | 0.17   | -0.55 | 0.29   | 0.14   | 0.43   | -0.14  | 0.20   | 0.30   | 0.37   | 0.36   | 0.18   |
| X36 | 0.61   | -0.75* | -0.68  | -0.87* | 0.52   | -0.15 | -0.46  | -0.74* | -0.69  | 0.58   | -0.64  | 0.13   | 0.04   | 0.05   | 0.31   |
| X37 | 0.75*  | -0.87* | -0.82* | -0.86* | 0.68   | -0.34 | -0.41  | -0.77* | -0.59  | 0.68   | -0.61  | 0.32   | 0.22   | 0.24   | 0.48   |
| X38 | 0.61   | -0.55  | -0.53  | -0.48  | 0.64   | -0.68 | -0.55  | -0.67  | -0.43  | 0.07   | -0.68  | 0.22   | 0.09   | 0.01   | 0.11   |
| X39 | 0.28   | -0.22  | -0.25  | -0.11  | 0.25   | -0.30 | -0.13  | -0.19  | -0.03  | 0.21   | -0.28  | 0.15   | 0.07   | 0.10   | 0.20   |
| X40 | -0.56  | 0.69   | 0.73*  | 0.53   | -0.63  | 0.17  | -0.25  | 0.24   | 0.09   | -0.86* | -0.07  | -0.59  | -0.61  | -0.72* | -0.82* |
| X41 | -0.57  | 0.72*  | 0.70*  | 0.77*  | -0.60  | 0.09  | 0.22   | 0.58   | 0.55   | -0.61  | 0.42   | -0.31  | -0.26  | -0.29  | -0.47  |
| X42 | -0.07  | 0.19   | 0.21   | -0.14  | -0.08  | -0.03 | -0.39  | -0.10  | -0.29  | -0.26  | -0.33  | -0.29  | -0.49  | -0.47  | -0.47  |
| X43 | -0.55  | 0.76*  | 0.77*  | 0.48   | -0.61  | 0.33  | -0.24  | 0.31   | 0.00   | -0.82* | 0.06   | -0.66  | -0.70* | -0.77* | -0.89* |

**Table S4 (continued) Correlation analysis on 43 indicators**

|     | X16    | X17    | X18    | X19    | X20    | X21    | X22   | X23   | X24   | X25   | X26   | X27   | X28    | X29    | X30    |
|-----|--------|--------|--------|--------|--------|--------|-------|-------|-------|-------|-------|-------|--------|--------|--------|
| X16 | 1.00   |        |        |        |        |        |       |       |       |       |       |       |        |        |        |
| X17 | 0.77*  | 1.00   |        |        |        |        |       |       |       |       |       |       |        |        |        |
| X18 | 0.82*  | 0.63   | 1.00   |        |        |        |       |       |       |       |       |       |        |        |        |
| X19 | 0.79*  | 0.83*  | 0.57   | 1.00   |        |        |       |       |       |       |       |       |        |        |        |
| X20 | 0.64   | 0.76*  | 0.41   | 0.72*  | 1.00   |        |       |       |       |       |       |       |        |        |        |
| X21 | -0.03  | 0.40   | -0.19  | 0.20   | 0.37   | 1.00   |       |       |       |       |       |       |        |        |        |
| X22 | -0.78* | -0.76* | -0.69  | -0.78* | -0.78* | 0.00   | 1.00  |       |       |       |       |       |        |        |        |
| X23 | 0.15   | 0.02   | 0.50   | 0.02   | 0.04   | -0.51  | -0.32 | 1.00  |       |       |       |       |        |        |        |
| X24 | -0.53  | -0.24  | -0.31  | -0.38  | -0.56  | 0.26   | 0.67  | -0.32 | 1.00  |       |       |       |        |        |        |
| X25 | -0.52  | -0.34  | -0.30  | -0.39  | -0.59  | 0.06   | 0.65  | -0.22 | 0.83* | 1.00  |       |       |        |        |        |
| X26 | 0.27   | 0.46   | 0.34   | 0.30   | 0.01   | 0.27   | -0.08 | -0.13 | 0.42  | 0.30  | 1.00  |       |        |        |        |
| X27 | -0.19  | -0.09  | -0.49  | 0.02   | 0.41   | 0.29   | -0.01 | -0.24 | -0.33 | -0.32 | -0.60 | 1.00  |        |        |        |
| X28 | 0.68   | 0.75*  | 0.74*  | 0.59   | 0.43   | 0.26   | -0.58 | 0.09  | -0.06 | -0.14 | 0.73* | -0.57 | 1.00   |        |        |
| X29 | -0.20  | 0.11   | -0.55  | 0.07   | 0.33   | 0.74*  | 0.13  | -0.61 | 0.01  | 0.00  | -0.17 | 0.66  | -0.22  | 1.00   |        |
| X30 | -0.61  | -0.64  | -0.39  | -0.62  | -0.84* | -0.25  | 0.80* | -0.04 | 0.65  | 0.74* | 0.22  | -0.41 | -0.29  | -0.26  | 1.00   |
| X31 | 0.28   | -0.08  | 0.58   | 0.02   | -0.15  | -0.73* | -0.31 | 0.75* | -0.32 | -0.22 | -0.05 | -0.45 | 0.14   | -0.89* | 0.06   |
| X32 | -0.75* | -0.78* | -0.79* | -0.70* | -0.57  | -0.09  | 0.86* | -0.28 | 0.36  | 0.40  | -0.39 | 0.38  | -0.84* | 0.27   | 0.60   |
| X33 | -0.24  | 0.02   | -0.54  | 0.08   | 0.38   | 0.49   | -0.01 | -0.37 | -0.20 | -0.21 | -0.53 | 0.88* | -0.47  | 0.84*  | -0.43  |
| X34 | -0.23  | -0.19  | -0.52  | -0.10  | 0.20   | 0.12   | 0.21  | -0.28 | -0.18 | -0.10 | -0.60 | 0.84* | -0.67  | 0.64   | -0.21  |
| X35 | 0.36   | 0.15   | 0.28   | 0.31   | 0.39   | -0.47  | -0.57 | 0.54  | -0.69 | -0.59 | -0.44 | 0.31  | -0.14  | -0.25  | -0.50  |
| X36 | -0.48  | -0.61  | -0.23  | -0.63  | -0.89* | -0.35  | 0.70* | 0.03  | 0.59  | 0.63  | 0.29  | -0.60 | -0.17  | -0.45  | 0.93*  |
| X37 | -0.42  | -0.60  | -0.08  | -0.57  | -0.83* | -0.51  | 0.56  | 0.25  | 0.44  | 0.51  | 0.18  | -0.60 | -0.18  | -0.63  | 0.86*  |
| X38 | -0.47  | -0.71* | -0.33  | -0.53  | -0.45  | -0.53  | 0.40  | 0.35  | -0.10 | 0.10  | -0.45 | 0.20  | -0.66  | -0.28  | 0.48   |
| X39 | -0.13  | -0.21  | 0.02   | -0.03  | -0.18  | -0.10  | 0.11  | 0.18  | 0.05  | 0.09  | 0.01  | -0.01 | -0.16  | -0.19  | 0.10   |
| X40 | -0.27  | -0.03  | -0.59  | -0.06  | 0.31   | 0.47   | 0.08  | -0.38 | -0.09 | -0.09 | -0.47 | 0.77* | -0.42  | 0.81*  | -0.33  |
| X41 | 0.30   | 0.41   | -0.03  | 0.46   | 0.69   | 0.24   | -0.44 | -0.12 | -0.54 | -0.53 | -0.40 | 0.63  | -0.09  | 0.58   | -0.72* |
| X42 | -0.35  | -0.32  | -0.53  | -0.19  | -0.06  | 0.20   | 0.41  | -0.22 | 0.05  | 0.12  | -0.11 | 0.49  | -0.44  | 0.41   | 0.34   |
| X43 | -0.23  | 0.01   | -0.57  | 0.02   | 0.30   | 0.59   | 0.12  | -0.61 | -0.08 | -0.17 | -0.32 | 0.78* | -0.36  | 0.88*  | -0.31  |

**Table S4 (continued) Correlation analysis on 43 indicators**

|     | X31    | X32   | X33   | X34   | X35   | X36    | X37    | X38   | X39   | X40   | X41  | X42  | X43  |
|-----|--------|-------|-------|-------|-------|--------|--------|-------|-------|-------|------|------|------|
| X31 | 1.00   |       |       |       |       |        |        |       |       |       |      |      |      |
| X32 | -0.33  | 1.00  |       |       |       |        |        |       |       |       |      |      |      |
| X33 | -0.65  | 0.28  | 1.00  |       |       |        |        |       |       |       |      |      |      |
| X34 | -0.50  | 0.56  | 0.75* | 1.00  |       |        |        |       |       |       |      |      |      |
| X35 | 0.43   | -0.24 | 0.11  | 0.24  | 1.00  |        |        |       |       |       |      |      |      |
| X36 | 0.23   | 0.44  | -0.61 | -0.39 | -0.47 | 1.00   |        |       |       |       |      |      |      |
| X37 | 0.47   | 0.36  | -0.68 | -0.42 | -0.26 | 0.93*  | 1.00   |       |       |       |      |      |      |
| X38 | 0.42   | 0.59  | -0.06 | 0.20  | 0.27  | 0.40   | 0.54   | 1.00  |       |       |      |      |      |
| X39 | 0.31   | 0.10  | -0.12 | -0.02 | -0.01 | 0.12   | 0.27   | 0.28  | 1.00  |       |      |      |      |
| X40 | -0.70* | 0.31  | 0.87* | 0.70* | 0.06  | -0.49  | -0.66  | -0.11 | -0.28 | 1.00  |      |      |      |
| X41 | -0.37  | -0.14 | 0.72* | 0.61  | 0.40  | -0.82* | -0.80* | -0.32 | -0.16 | 0.57  | 1.00 |      |      |
| X42 | -0.34  | 0.65  | 0.34  | 0.45  | -0.04 | 0.12   | 0.10   | 0.47  | 0.15  | 0.29  | 0.04 | 1.00 |      |
| X43 | -0.79* | 0.35  | 0.85* | 0.69* | -0.11 | -0.49  | -0.61  | -0.10 | -0.20 | 0.77* | 0.53 | 0.41 | 1.00 |

\* mean significant level at 0.05, numbers indicate the Pearson's correlation coefficient values (r). X1-X43: L\* value, a\* value, b\* value, ascorbic acid, S-methyl-L-cysteine, quercitrin, propene, propene sulfide, 2-propen-1-ol, di(1-propenyl) sulfide, 2-ethylthiophene, methyl propenyl disulfide, dimethyl trisulfide, diallyl disulfide, diallyl tetrasulphide, (Z)-benzaloxime, 3-vinyl-1,2-dithiacyclohex-4-ene, diallyl trisulfide, 3-vinyl-1,2-dithiacyclohex-5-ene, propionic acid, 1,3-propanediol, L-alanine, ethanimidic acid, serine, L-threonine, L-proline, n.-octanoic acid,

xylulose, ornithine, glutamic acid, arabinose, L-asparagine, lantionine, L-tyrosine, isocitric acid, D-fructose, D-glucose, L-lysine, gluconic acid, L-homoserine, myo-inositol, succinylacetone, sucrose.

**Table S5** The relative concentration of 43 quality indicators

|     | X1     | X2    | X3    | X4     | X5    | X6    | X7    | X8    | X9    | X10   | X11   | X12   | X13   | X14   | X15   | X16   | X17   | X18   | X19   | X20   | X21   | X22   | X23   | X24   | X25   | X26   | X27   | X28   | X29   | X30   | X31   | X32   | X33   | X34   | X35   | X36   | X37   | X38   | X39   | X40   | X41   | X42   | X43   |
|-----|--------|-------|-------|--------|-------|-------|-------|-------|-------|-------|-------|-------|-------|-------|-------|-------|-------|-------|-------|-------|-------|-------|-------|-------|-------|-------|-------|-------|-------|-------|-------|-------|-------|-------|-------|-------|-------|-------|-------|-------|-------|-------|-------|
| SD1 | 33.250 | 0.407 | 3.363 | 34.890 | 3.070 | 0.408 | 0.382 | 0.023 | 0.046 | 0.013 | 0.005 | 0.082 | 0.005 | 3.381 | 1.670 | 0.286 | 0.502 | 0.158 | 0.047 | 1.090 | 0.018 | 0.136 | 0.162 | 0.073 | 0.039 | 0.195 | 0.355 | 0.011 | 0.123 | 0.256 | 0.004 | 0.280 | 0.245 | 0.247 | 1.096 | 0.843 | 0.300 | 0.150 | 0.037 | 0.077 | 0.642 | 0.004 | 8.360 |
| SD2 | 33.203 | 0.450 | 3.890 | 29.510 | 2.540 | 0.423 | 0.242 | 0.014 | 0.029 | 0.008 | 0.003 | 0.064 | 0.003 | 3.000 | 1.415 | 0.218 | 0.347 | 0.139 | 0.036 | 1.184 | 0.017 | 0.150 | 0.181 | 0.100 | 0.049 | 0.228 | 0.431 | 0.011 | 0.130 | 0.324 | 0.004 | 0.270 | 0.228 | 0.359 | 1.317 | 1.076 | 0.348 | 0.176 | 0.030 | 0.099 | 0.610 | 0.004 | 8.050 |
| SD3 | 32.253 | 0.570 | 3.867 | 36.340 | 3.030 | 0.529 | 0.307 | 0.019 | 0.037 | 0.011 | 0.004 | 0.072 | 0.002 | 2.933 | 1.553 | 0.237 | 0.467 | 0.132 | 0.043 | 1.269 | 0.016 | 0.149 | 0.207 | 0.073 | 0.048 | 0.220 | 0.529 | 0.016 | 0.164 | 0.359 | 0.003 | 0.376 | 0.268 | 0.358 | 1.597 | 0.891 | 0.309 | 0.206 | 0.022 | 0.113 | 0.781 | 0.025 | 8.226 |
| SD4 | 33.183 | 0.430 | 3.913 | 25.310 | 3.550 | 0.460 | 0.350 | 0.020 | 0.037 | 0.012 | 0.005 | 0.083 | 0.003 | 3.257 | 1.564 | 0.267 | 0.496 | 0.159 | 0.050 | 1.274 | 0.018 | 0.136 | 0.173 | 0.080 | 0.041 | 0.238 | 0.540 | 0.012 | 0.139 | 0.349 | 0.003 | 0.379 | 0.238 | 0.344 | 1.360 | 1.048 | 0.396 | 0.189 | 0.027 | 0.090 | 0.600 | 0.028 | 8.548 |
| SD5 | 33.293 | 0.460 | 3.867 | 21.450 | 3.140 | 0.290 | 0.333 | 0.024 | 0.036 | 0.013 | 0.004 | 0.086 | 0.003 | 3.328 | 1.521 | 0.304 | 0.493 | 0.125 | 0.049 | 1.309 | 0.021 | 0.142 | 0.202 | 0.082 | 0.046 | 0.276 | 0.557 | 0.010 | 0.148 | 0.364 | 0.004 | 0.385 | 0.214 | 0.375 | 1.406 | 1.040 | 0.362 | 0.195 | 0.032 | 0.119 | 0.696 | 0.032 | 7.925 |
| SD6 | 33.253 | 0.523 | 3.670 | 28.630 | 3.160 | 0.434 | 0.329 | 0.022 | 0.036 | 0.013 | 0.005 | 0.091 | 0.003 | 3.304 | 1.499 | 0.335 | 0.528 | 0.171 | 0.064 | 1.312 | 0.023 | 0.153 | 0.214 | 0.073 | 0.037 | 0.317 | 0.631 | 0.014 | 0.132 | 0.365 | 0.005 | 0.404 | 0.214 | 0.388 | 1.369 | 1.024 | 0.404 | 0.219 | 0.035 | 0.012 | 0.678 | 0.033 | 8.195 |
| SD7 | 33.297 | 0.523 | 3.800 | 26.530 | 3.060 | 0.477 | 0.328 | 0.020 | 0.034 | 0.012 | 0.005 | 0.076 | 0.002 | 3.220 | 1.542 | 0.278 | 0.514 | 0.148 | 0.056 | 1.277 | 0.020 | 0.145 | 0.119 | 0.079 | 0.039 | 0.326 | 0.577 | 0.012 | 0.103 | 0.329 | 0.005 | 0.336 | 0.185 | 0.353 | 1.407 | 0.887 | 0.425 | 0.195 | 0.153 | 0.013 | 0.660 | 0.028 | 8.371 |
| JS1 | 33.183 | 0.527 | 3.820 | 35.490 | 2.220 | 0.732 | 0.615 | 0.036 | 0.049 | 0.016 | 0.010 | 0.106 | 0.008 | 4.213 | 2.334 | 0.593 | 1.172 | 0.229 | 0.101 | 1.437 | 0.016 | 0.063 | 0.034 | 0.065 | 0.033 | 0.416 | 0.148 | 0.055 | 0.042 | 0.255 | 0.007 | 0.072 | 0.042 | 0.070 | 1.475 | 0.862 | 0.296 | 0.123 | 0.012 | 0.016 | 0.644 | 0.012 | 7.638 |
| JS2 | 33.237 | 0.530 | 3.730 | 37.790 | 3.410 | 0.819 | 0.574 | 0.030 | 0.045 | 0.016 | 0.009 | 0.122 | 0.006 | 4.034 | 2.332 | 0.555 | 0.962 | 0.229 | 0.092 | 1.479 | 0.017 | 0.077 | 0.028 | 0.056 | 0.037 | 0.478 | 0.155 | 0.064 | 0.055 | 0.232 | 0.006 | 0.061 | 0.035 | 0.064 | 1.388 | 0.791 | 0.267 | 0.132 | 0.011 | 0.015 | 0.697 | 0.010 | 7.775 |
| JS3 | 32.623 | 0.490 | 3.913 | 27.810 | 3.030 | 0.787 | 0.519 | 0.030 | 0.107 | 0.015 | 0.008 | 0.115 | 0.009 | 4.080 | 2.300 | 0.459 | 0.971 | 0.237 | 0.085 | 1.530 | 0.015 | 0.073 | 0.341 | 0.061 | 0.036 | 0.449 | 0.174 | 0.070 | 0.045 | 0.277 | 0.007 | 0.070 | 0.035 | 0.066 | 1.294 | 0.799 | 0.320 | 0.126 | 0.013 | 0.014 | 0.642 | 0.012 | 7.509 |
| JS4 | 32.490 | 0.527 | 3.827 | 30.270 | 2.910 | 0.704 | 0.505 | 0.031 | 0.105 | 0.015 | 0.008 | 0.113 | 0.007 | 4.089 | 2.476 | 0.497 | 1.040 | 0.262 | 0.097 | 1.469 | 0.020 | 0.086 | 0.300 | 0.079 | 0.046 | 0.429 | 0.129 | 0.060 | 0.059 | 0.318 | 0.006 | 0.073 | 0.037 | 0.057 | 1.348 | 0.775 | 0.290 | 0.129 | 0.012 | 0.015 | 0.671 | 0.011 | 7.395 |
| JS5 | 32.540 | 0.510 | 3.910 | 30.170 | 3.240 | 0.657 | 0.499 | 0.030 | 0.063 | 0.018 | 0.009 | 0.131 | 0.007 | 4.223 | 2.464 | 0.510 | 1.116 | 0.255 | 0.087 | 1.414 | 0.035 | 0.096 | 0.268 | 0.088 | 0.036 | 0.402 | 0.116 | 0.065 | 0.060 | 0.268 | 0.006 | 0.076 | 0.035 | 0.046 | 1.304 | 0.730 | 0.288 | 0.130 | 0.014 | 0.013 | 0.680 | 0.010 | 7.964 |
| JS6 | 32.610 | 0.540 | 3.863 | 27.930 | 2.530 | 0.659 | 0.541 | 0.029 | 0.118 | 0.019 | 0.008 | 0.134 | 0.005 | 4.109 | 2.683 | 0.427 | 1.159 | 0.264 | 0.050 | 1.490 | 0.039 | 0.087 | 0.302 | 0.086 | 0.040 | 0.452 | 0.131 | 0.064 | 0.070 | 0.238 | 0.006 | 0.072 | 0.038 | 0.060 | 1.241 | 0.831 | 0.330 | 0.123 | 0.015 | 0.014 | 0.629 | 0.010 | 7.416 |
| JS7 | 32.590 | 0.540 | 3.777 | 36.480 | 3.350 | 0.585 | 0.496 | 0.032 | 0.110 | 0.019 | 0.007 | 0.118 | 0.006 | 4.038 | 2.651 | 0.445 | 1.029 | 0.250 | 0.100 | 1.444 | 0.033 | 0.080 | 0.324 | 0.090 | 0.045 | 0.492 | 0.146 | 0.061 | 0.065 | 0.252 | 0.008 | 0.078 | 0.044 | 0.066 | 1.208 | 0.790 | 0.306 | 0.138 | 0.017 | 0.014 | 0.606 | 0.014 | 7.295 |
| HN1 | 33.193 | 0.433 | 3.577 | 29.870 | 3.860 | 0.232 | 0.494 | 0.029 | 0.113 | 0.009 | 0.008 | 0.148 | 0.008 | 4.148 | 2.366 | 0.455 | 1.009 | 0.215 | 0.084 | 1.552 | 0.004 | 0.052 | 0.493 | 0.023 | 0.018 | 0.299 | 0.663 | 0.027 | 0.015 | 0.192 | 0.012 | 0.130 | 0.221 | 0.292 | 2.448 | 0.456 | 0.232 | 0.211 | 0.042 | 0.071 | 0.843 | 0.016 | 7.934 |
| HN2 | 32.353 | 0.473 | 3.667 | 41.100 | 3.300 | 0.231 | 0.537 | 0.027 | 0.107 | 0.014 | 0.008 | 0.154 | 0.008 | 4.290 | 2.310 | 0.502 | 0.845 | 0.233 | 0.092 | 1.451 | 0.005 | 0.040 | 0.411 | 0.029 | 0.020 | 0.254 | 0.387 | 0.036 | 0.020 | 0.157 | 0.009 | 0.072 | 0.153 | 0.246 | 2.678 | 0.529 | 0.252 | 0.159 | 0.036 | 0.042 | 0.904 | 0.015 | 7.544 |
| HN3 | 33.380 | 0.437 | 3.563 | 42.960 | 3.770 | 0.260 | 0.434 | 0.027 | 0.092 | 0.015 | 0.008 | 0.156 | 0.008 | 4.263 | 2.452 | 0.405 | 0.796 | 0.234 | 0.083 | 1.591 | 0.006 | 0.044 | 0.354 | 0.033 | 0.028 | 0.192 | 0.463 | 0.035 | 0.020 | 0.194 | 0.011 | 0.101 | 0.144 | 0.214 | 2.102 | 0.340 | 0.291 | 0.192 | 0.037 | 0.015 | 0.824 | 0.011 | 7.820 |
| HN4 | 33.327 | 0.500 | 3.527 | 33.820 | 4.130 | 0.239 | 0.485 | 0.028 | 0.103 | 0.017 | 0.007 | 0.173 | 0.008 | 4.432 | 2.608 | 0.466 | 0.873 | 0.235 | 0.079 | 1.646 | 0.005 | 0.060 | 0.393 | 0.035 | 0.022 | 0.241 | 0.406 | 0.037 | 0.019 | 0.179 | 0.011 | 0.099 | 0.154 | 0.188 | 1.859 | 0.436 | 0.209 | 0.177 | 0.043 | 0.043 | 0.865 | 0.011 | 7.640 |
| HN5 | 33.160 | 0.427 | 3.580 | 37.280 | 4.590 | 0.306 | 0.574 | 0.027 | 0.092 | 0.014 | 0.007 | 0.157 | 0.009 | 4.483 | 2.542 | 0.569 | 0.828 | 0.278 | 0.078 | 1.595 | 0.008 | 0.057 | 0.364 | 0.033 | 0.026 | 0.230 | 0.514 | 0.034 | 0.021 | 0.163 | 0.010 | 0.141 | 0.152 | 0.270 | 1.933 | 0.485 | 0.227 | 0.193 | 0.048 | 0.041 | 0.794 | 0.012 | 8.007 |
| HN6 | 33.340 | 0.493 | 3.677 | 50.480 | 2.570 | 0.297 | 0.553 | 0.028 | 0.098 | 0.014 | 0.007 | 0.163 | 0.009 | 4.392 | 2.550 | 0.550 | 0.928 | 0.265 | 0.083 | 1.581 | 0.010 | 0.071 | 0.424 | 0.035 | 0.032 | 0.166 | 0.448 | 0.034 | 0.022 | 0.173 | 0.010 | 0.107 | 0.181 | 0.303 | 2.112 | 0.425 | 0.255 | 0.155 | 0.069 | 0.051 | 0.948 | 0.012 | 7.097 |
| HN7 | 33.263 | 0.427 | 3.550 | 46.910 | 3.210 | 0.231 | 0.535 | 0.028 | 0.091 | 0.011 | 0.008 | 0.153 | 0.012 | 4.400 | 2.752 | 0.538 | 0.761 | 0.253 | 0.082 | 1.497 | 0.014 | 0.069 | 0.219 | 0.036 | 0.023 | 0.202 | 0.586 | 0.039 | 0.017 | 0.181 | 0.012 | 0.125 | 0.166 | 0.240 | 1.646 | 0.470 | 0.215 | 0.169 | 0.071 | 0.038 | 0.786 | 0.013 | 7.768 |
| YN1 | 31.423 | 1.017 | 4.767 | 61.560 | 1.390 | 0.603 | 0.497 | 0.034 | 0.107 | 0.007 | 0.008 | 0.034 | 0.001 | 3.299 | 1.141 | 0.457 | 1.073 | 0.208 | 0.088 | 1.710 | 0.034 | 0.091 | 0.115 | 0.088 | 0.027 | 0.312 | 0.713 | 0.040 | 0.133 | 0.125 | 0.001 | 0.201 | 0.287 | 0.416 | 1.754 | 0.138 | 0.043 | 0.110 | 0.011 | 0.115 | 0.920 | 0.014 | 8.605 |
| YN2 | 31.877 | 0.950 | 5.157 | 42.920 | 1.490 | 0.485 | 0.512 | 0.036 | 0.108 | 0.009 | 0.009 | 0.050 | 0.002 | 3.193 | 1.120 | 0.557 | 0.936 | 0.202 | 0.080 | 1.720 | 0.032 | 0.079 | 0.131 | 0.008 | 0.013 | 0.263 | 0.702 | 0.043 | 0.311 | 0.115 | 0.000 | 0.187 | 0.299 | 0.512 | 1.657 | 0.166 | 0.030 | 0.125 | 0.026 | 0.118 | 1.171 | 0.021 | 9.024 |
| YN3 | 31.907 | 0.937 | 5.227 | 57.400 | 1.170 | 0.607 | 0.482 | 0.040 | 0.132 | 0.008 | 0.008 | 0.043 | 0.002 | 2.922 | 1.139 | 0.448 | 1.121 | 0.189 | 0.101 | 1.637 | 0.021 | 0.071 | 0.133 | 0.063 | 0.035 | 0.252 | 0.734 | 0.022 | 0.255 | 0.139 | 0.000 | 0.187 | 0.487 | 0.536 | 1.695 | 0.138 | 0.059 | 0.109 | 0.028 | 0.112 | 1.453 | 0.012 | 8.695 |
| YN4 | 31.820 | 0.943 | 5.287 | 52.270 | 1.540 | 0.729 | 0.468 | 0.037 | 0.122 | 0.006 | 0.008 | 0.022 | 0.004 | 3.188 | 1.080 | 0.447 | 1.051 | 0.194 | 0.089 | 1.711 | 0.036 | 0.068 | 0.131 | 0.065 | 0.044 | 0.321 | 0.880 | 0.035 | 0.241 | 0.159 | 0.001 | 0.145 | 0.343 | 0.469 | 1.777 | 0.130 | 0.040 | 0.142 | 0.026 | 0.138 | 0.840 | 0.018 | 8.813 |
| YN5 | 31.940 | 1.040 | 5.087 | 55.560 | 1.260 | 0.767 | 0.547 | 0.044 | 0.131 | 0.007 | 0.009 | 0.048 | 0.005 | 3.368 | 1.090 | 0.512 | 1.213 | 0.206 | 0.112 | 1.740 | 0.047 | 0.072 | 0.130 | 0.053 | 0.037 | 0.278 | 0.765 | 0.038 | 0.335 | 0.159 | 0.000 | 0.175 | 0.482 | 0.546 | 1.649 | 0.139 | 0.056 | 0.151 | 0.032 | 0.132 | 1.054 | 0.026 | 9.218 |
| YN6 | 32.097 | 0.957 | 4.910 | 60.020 | 1.360 | 0.839 | 0.399 | 0.031 | 0.109 | 0.005 | 0.009 | 0.016 | 0.002 | 3.149 | 0.933 | 0.424 | 1.099 | 0.173 | 0.089 | 1.723 | 0.045 | 0.063 | 0.135 | 0.037 | 0.021 | 0.246 | 0.749 | 0.036 | 0.279 | 0.143 | 0.000 | 0.139 | 0.432 | 0.488 | 1.498 | 0.148 | 0.056 | 0.128 | 0.022 | 0.133 | 1.186 | 0.016 | 8.    |
